# Supplementary material for: Versatile synthetic strategies for PBCA-based hybrid fluorescent microbubbles and their potential theranostic applications to cell labelling and imaging
Source: Royal Society of Chemistry journal article supplement (doi:10.1039/c2cc18048k), 2012-01-01
Supplement: c2cc18048k-1.pdf [file c2cc18048k-1.pdf]

**Versatile synthetic strategies for PBCA-based hybrid fluorescent microbubbles and their potential theranostic applications to cell labelling and imaging**

Zhe Liu,\* Patrick Koczera, Dennis Doleschel, Fabian Kiessling and Jessica Gätjens

*Chem. Commun.*, 2012, **48**, 5142–5144 (DOI: 10.1039/C2CC18048K)

---

The following article ‘Versatile synthetic strategies for PBCA-based hybrid fluorescent microbubbles and their potential theranostic applications to cell labelling and imaging’ by Zhe Liu, Patrick Koczera, Dennis Doleschel, Fabian Kiessling and Jessica Gätjens, has been published in *Chemical Communications*. The article reports the versatile synthetic strategies for hybrid PBCA microbubbles as contrast agents and drug carriers loaded with Fluorescent dyes and magnetic nanoparticles serving in vitro cell labelling and in vivo target imaging.

*Chemical Communications* is publishing this Expression of Concern in order to alert our readers to the fact that the following authors, Patrick Koczera, Dennis Doleschel, Fabian Kiessling and Jessica Gätjens were unaware of the article’s existence and have serious concerns about the data and its interpretation. The co-authors would therefore like to remove their names from the article.

In response to our queries, the co-authors have provided us with additional information to support their concerns however despite our best efforts we have been unable to contact, Zhe Liu as he has now left the institute. This Expression of Concern will continue to be associated with the article while we investigate further.

Robert D Eagling  
6<sup>th</sup> December  
Editor, *Chemical Communications*

---
